# Supplementary material for: Chlorthalidone vs Hydrochlorothiazide and Kidney Outcomes in Patients With Hypertension: A Secondary Analysis of a Randomized Clinical Trial
Source: PubMed Central journal article supplement (PMC11632543; doi:10.1001/jamanetworkopen.2024.49576), 2024-12-10
Supplement: jamanetwopen-e2449576-s002.pdf [file jamanetwopen-e2449576-s002.pdf]

## Supplementary Online Content

Ishani A, Hau C, Raju S, et al. Chlorthalidone vs hydrochlorothiazide and kidney outcomes in patients with hypertension: a secondary analysis of a randomized clinical trial. *JAMA Netw Open*. 2024;7(12):e2449576.  
doi:10.1001/jamanetworkopen.2024.49576

**eFigure 1.** Consort Diagram of Patient Flow

**eTable 1.** CPT Codes Used to Define Dialysis Procedures

**eTable 2.** Demographic and Baseline Information by Treatment and eGFR Level<sup>a</sup>

**eFigure 2.** Primary Outcome: Time to Doubling of Serum Creatinine, Terminal eGFR < 15 mL/min, or Dialysis Initiation

**eFigure 3.** Exploratory Outcome: Time to a 40% Reduction in eGFR, Terminal eGFR <15 mL/min, or Dialysis Initiation

**eTable 3.** Use of Selected Medications Over Time

**eFigure 4.** Adjusted Subgroup Analysis: Time to Doubling of Serum Creatinine, Terminal eGFR <15 mL/min/1.73m<sup>2</sup>, or Dialysis Initiation

**eFigure 5.** Unadjusted Subgroup Analysis: Time to > 40% Reduction in eGFR, Terminal eGFR < 15 mL/min/1.73m<sup>2</sup>, or Dialysis Initiation

**eTable 4.** Safety Outcomes by Treatment and eGFR Level

This supplementary material has been provided by the authors to give readers additional information about their work.

**eFigure 1.** Consort Diagram of Patient Flow

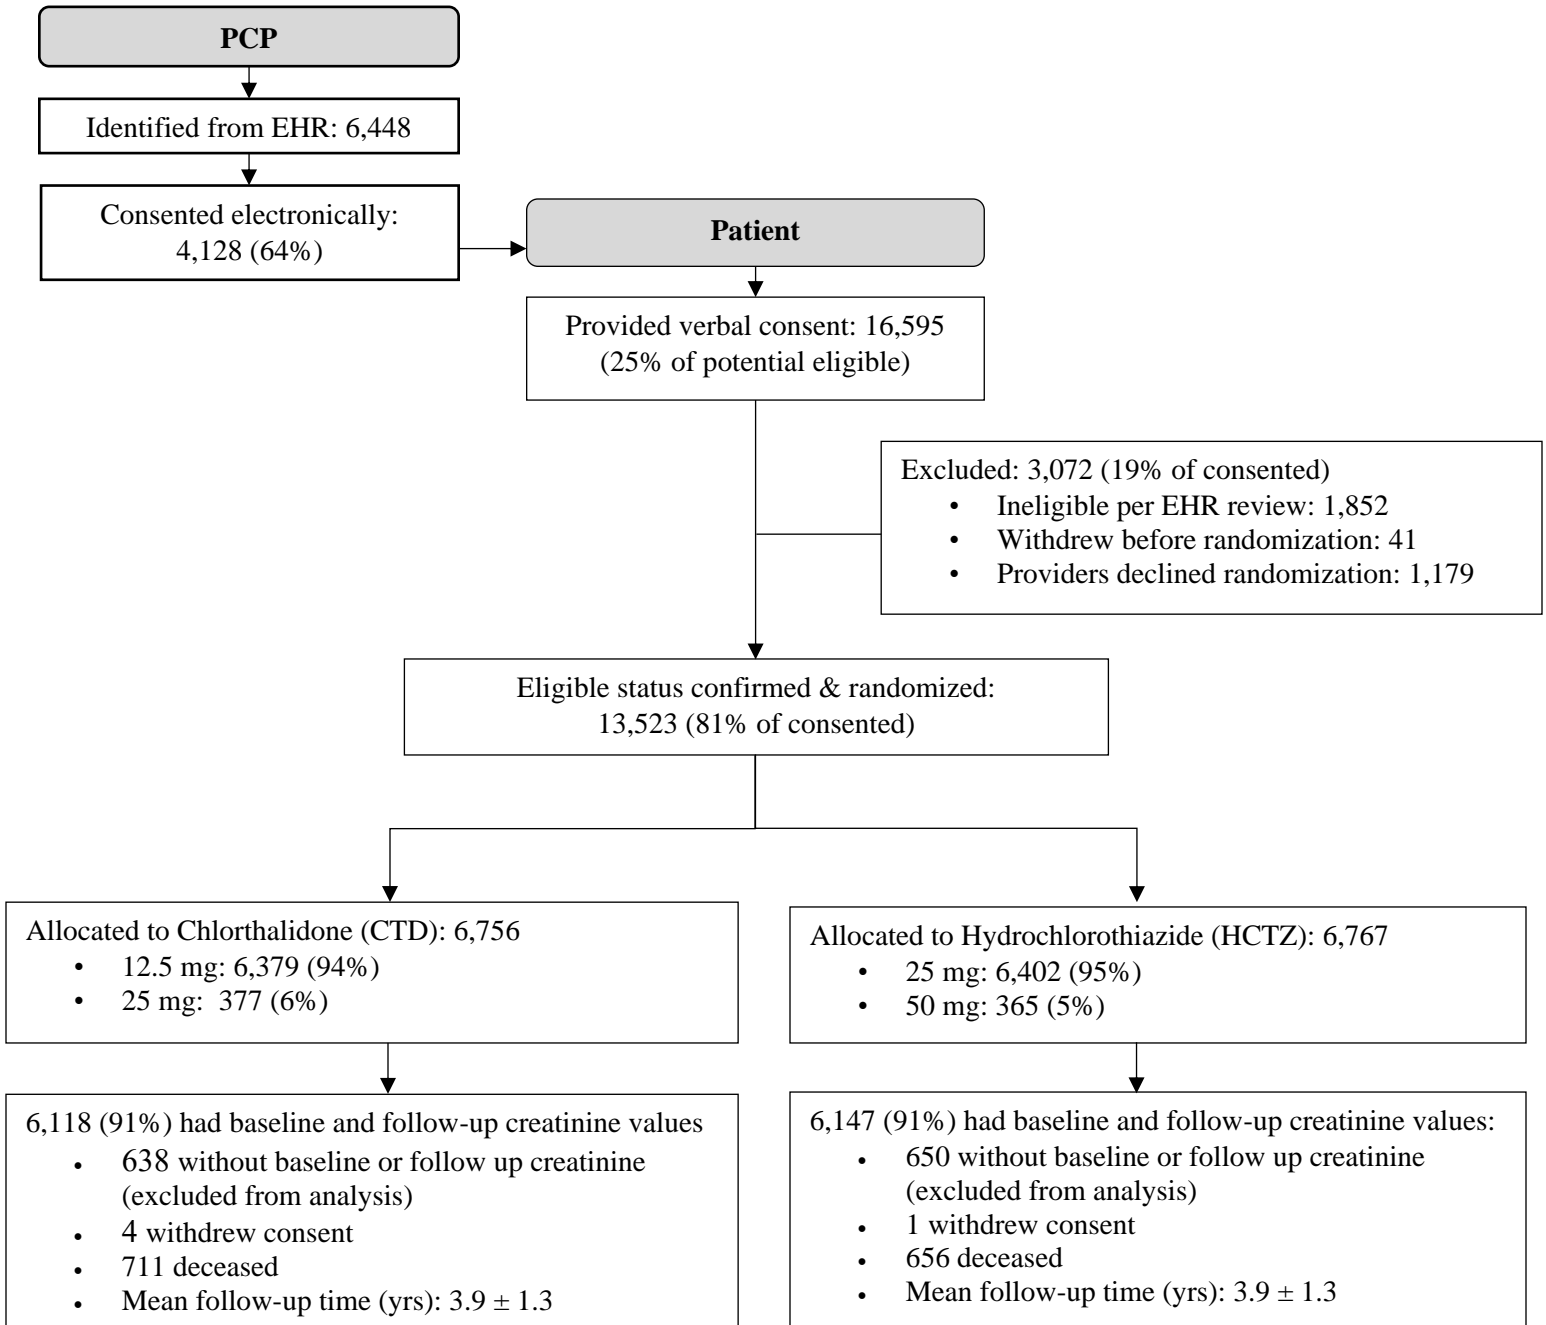

**eTable 1.** CPT Codes Used to Define Dialysis Procedures

| CPT Codes       |                                                                                                                                                                                                                                                                                                                                                                                                                      |
|-----------------|----------------------------------------------------------------------------------------------------------------------------------------------------------------------------------------------------------------------------------------------------------------------------------------------------------------------------------------------------------------------------------------------------------------------|
| <b>Dialysis</b> | 90918, 90919, 90920, 90921, 90922, 90923, 90924, 90925, 90935, 90937, 90939, 90940, 90941, 90942, 90943, 90944, 90945, 90947, 90951, 90952, 90953, 90954, 90955, 90956, 90957, 90958, 90959, 90960, 90961, 90962, 90963, 90964, 90965, 90966, 90967, 90968, 90969, 90970, 90976, 90977, 90978, 90979, 90982, 90983, 90984, 90985, 90988, 90989, 90990, 90991, 90992, 90993, 90994, 90995, 90996, 90997, 90998, 90999 |

**eTable 2.** Demographic and Baseline Information by Treatment and eGFR Level<sup>a</sup>

|                                                   | Baseline eGFR $\geq 60$<br>(N = 9,038) |                     | Baseline eGFR $< 60$<br>(N = 3,227) |                    |
|---------------------------------------------------|----------------------------------------|---------------------|-------------------------------------|--------------------|
|                                                   | CTD<br>(n = 4,520)                     | HCTZ<br>(n = 4,518) | CTD<br>(n=1,598)                    | HCTZ<br>(n=1,629)  |
| Age, yrs – median (IQR)                           | 71 (68 – 74)                           | 71 (68 – 74)        | 73 (70 – 77)                        | 73 (70 – 77)       |
| Body Mass Index, kg/m <sup>2</sup> - median (IQR) | 31.2 (27.8 – 35.1)                     | 31.3 (27.9 – 35.3)  | 30.9 (27.7- 34.8)                   | 31.0 (27.9 – 35.0) |
| Sex                                               |                                        |                     |                                     |                    |
| Female                                            | 149 (3.3)                              | 139 (3.1)           | 49 (3.1)                            | 52 (3.2)           |
| Male                                              | 4,371 (96.7)                           | 4,379 (96.9)        | 1,549 (96.9)                        | 1,577 (96.8)       |
| Race                                              |                                        |                     |                                     |                    |
| Black                                             | 704 (15.6)                             | 685 (15.2)          | 211 (13.2)                          | 237 (14.5)         |
| White                                             | 3501 (77.5)                            | 3,514 (77.8)        | 1,244 (77.8)                        | 1,259 (77.3)       |
| Other <sup>b</sup>                                | 94 (2.1)                               | 96 (2.1)            | 50 (3.1)                            | 46 (2.8)           |
| Unknown due to missing data                       | 221 (4.9)                              | 223 (4.9)           | 93 (5.8)                            | 87 (5.3)           |
| Ethnicity                                         |                                        |                     |                                     |                    |
| Hispanic/Latino                                   | 164 (3.6)                              | 185 (4.1)           | 55 (3.4)                            | 60 (3.7)           |
| Not Hispanic/Latino                               | 4,199 (92.9)                           | 4,190 (92.7)        | 1,482 (92.7)                        | 1,503 (92.3)       |
| Unknown due to missing data                       | 157 (3.5)                              | 143 (3.2)           | 61 (3.8)                            | 66 (4.1)           |
| Resided in rural areas <sup>c</sup>               | 2,043 (45.2)                           | 2,074 (45.9)        | 735 (46.0)                          | 709 (43.5)         |
| Current smoker                                    | 1,038 (23.0)                           | 959 (21.2)          | 347 (21.7)                          | 342 (21.0)         |
| Medical History                                   |                                        |                     |                                     |                    |
| Diabetes                                          | 1,865 (41.3)                           | 1,926 (42.6)        | 898 (56.2)                          | 936 (57.5)         |
| Heart failure                                     | 312 (6.9)                              | 295 (6.5)           | 174 (11.0)                          | 192 (11.8)         |
| Myocardial infarction                             | 146 (3.2)                              | 152 (3.4)           | 68 (4.3)                            | 80 (4.9)           |
| Stroke                                            | 322 (7.1)                              | 294 (6.5)           | 172 (10.8)                          | 151 (9.3)          |
| Hydrochlorothiazide (HCTZ) 25 mg                  | 4,279 (94.6)                           | 4,266 (94.4)        | 1,508 (94.4)                        | 1,544 (94.8)       |
| Systolic BP, mm Hg - median (IQR)                 | 139 (131 – 152)                        | 139 (130 – 152)     | 139 (130 – 152)                     | 139 (130 – 154)    |
| Serum Creatinine, mg/dL - median (IQR)            | 1.0 (0.9 – 1.1)                        | 1.0 (0.9 – 1.1)     | 1.4 (1.3 – 1.6)                     | 1.4 (1.3 – 1.6)    |
| Serum Potassium, mg/dL - median (IQR)             | 4.0 (3.8 – 4.3)                        | 4.0 (3.8 – 4.3)     | 4.1 (3.9 – 4.5)                     | 4.1 (3.9 – 4.4)    |
| eGFR, ml/min/1.73m <sup>2</sup> - median (IQR)    | 77.5 (68.6 – 89.2)                     | 77.2 (68.3 – 87.3)  | 50.0 (42.3 – 55.0)                  | 49.8 (42.1 – 55.2) |
| Antihypertensive drug use                         |                                        |                     |                                     |                    |
| HCTZ alone                                        | 644 (14.2)                             | 633 (14.0)          | 148 (9.3)                           | 127 (7.8)          |
| HCTZ + 1 additional BP med                        | 1,606 (35.5)                           | 1,584 (35.1)        | 494 (30.9)                          | 482 (29.6)         |
| HCTZ + 2 additional BP meds                       | 1,454 (32.2)                           | 1,464 (32.4)        | 535 (33.5)                          | 562 (34.5)         |
| HCTZ + 3 additional BP meds                       | 668 (14.8)                             | 666 (14.7)          | 316 (19.8)                          | 339 (20.8)         |
| HCTZ + 4 additional BP meds                       | 148 (3.3)                              | 171 (3.8)           | 105 (6.6)                           | 119 (7.3)          |
| Other drug use                                    |                                        |                     |                                     |                    |
| ACE inhibitor or ARB                              | 2,841 (62.9)                           | 2,844 (62.9)        | 1,133 (70.9)                        | 1,191 (73.1)       |
| Loop diuretic                                     | 73 (1.6)                               | 83 (1.8)            | 58 (3.6)                            | 74 (4.5)           |
| SGLT-2 inhibitor                                  | 110 (2.4)                              | 109 (2.4)           | 51 (3.2)                            | 61 (3.7)           |
| Spironolactone or Eplerenone                      | 581 (12.9)                             | 601 (13.3)          | 188 (11.8)                          | 183 (11.2)         |

<sup>a</sup> Data are presented as number(percentage) of patients unless otherwise indicated.

b Included American Indian, Asian, Hawaiian, Pacific Islander, and multiracial.

c Based on Place of residence was defined according to the Veterans Affairs urban, rural, or highly rural classification system.

**eFigure 2.** Primary Outcome: Time to Doubling of Serum Creatinine, Terminal eGFR < 15 mL/min, or Dialysis Initiation

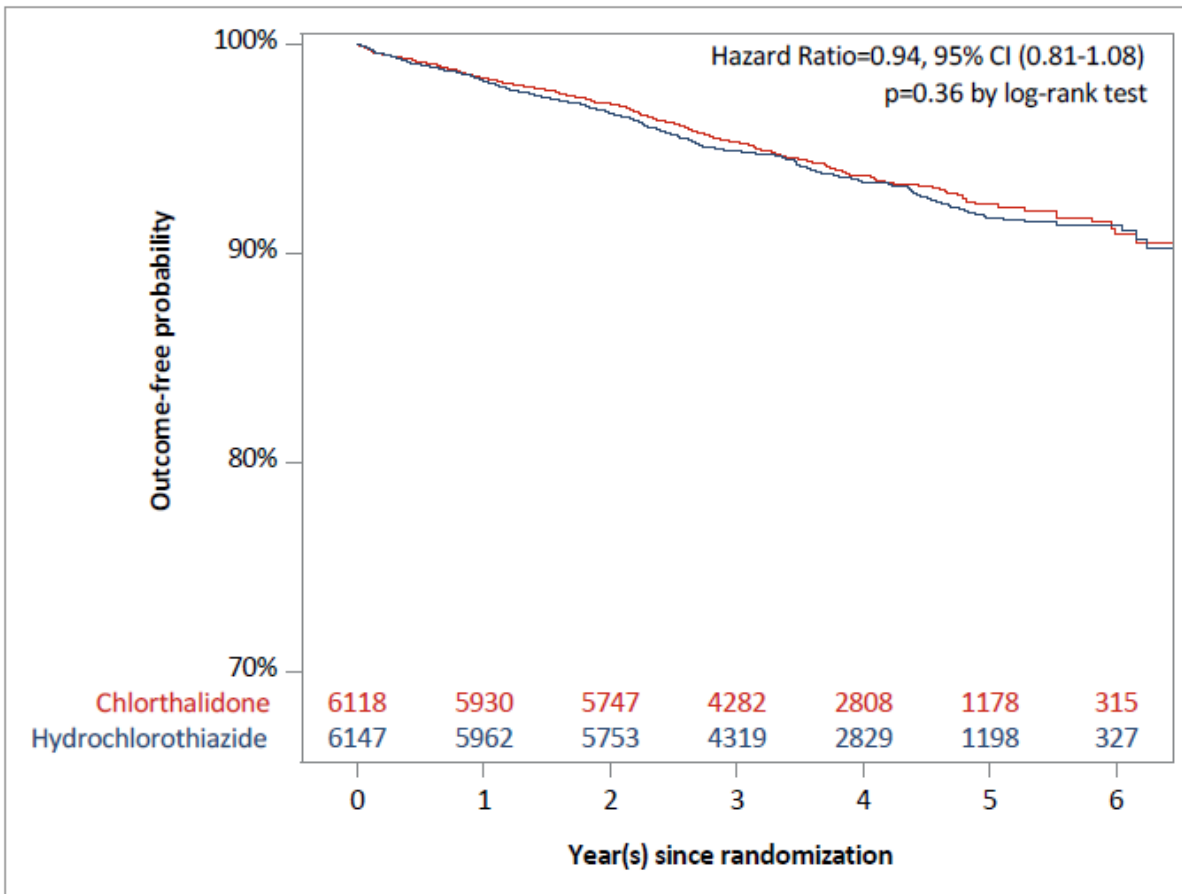

**eFigure 3.** Exploratory Outcome: Time to a 40% Reduction in eGFR, Terminal eGFR <15 mL/min, or Dialysis Initiation

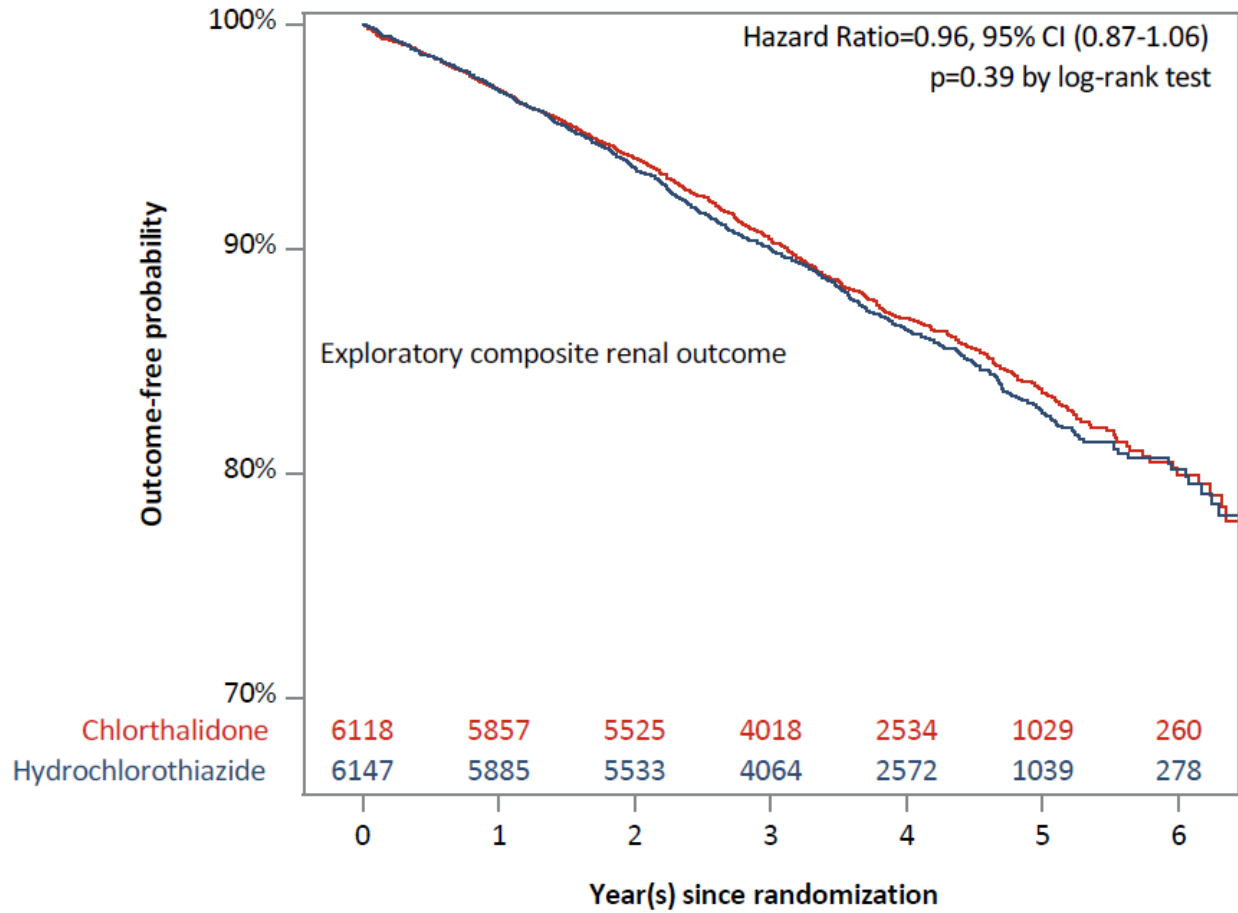

**eTable 3.** Use of Selected Medications Over Time

| Baseline<br>eGFR <60<br>(N=3,227) | Baseline     |              | 6 months     |              | 12 months    |              | 18 months    |              | 24 months    |              |
|-----------------------------------|--------------|--------------|--------------|--------------|--------------|--------------|--------------|--------------|--------------|--------------|
|                                   | CTD          | HCTZ         | CTD          | HCTZ         | CTD          | HCTZ         | CTD          | HCTZ         | CTD          | HCTZ         |
|                                   | (n=4,520)    | (n=4,518)    | (n=4,503)    | (n=4,501)    | (N=4,014)    | (n=4,048)    | (n=3,352)    | (n=3,366)    | (n=2,706)    | (n=2,724)    |
| <b>ACE</b>                        | 1,604 (35.5) | 1,650 (36.5) | 1,555 (34.5) | 1,629 (36.2) | 1,377 (34.3) | 1,448 (35.8) | 1,121 (33.4) | 1,196 (35.5) | 886 (32.7)   | 934 (34.3)   |
| <b>ARB</b>                        | 1,256 (27.8) | 1,209 (26.8) | 1,247 (27.7) | 1,233 (27.4) | 1,119 (27.9) | 1,105 (27.3) | 949 (28.3)   | 907 (26.9)   | 766 (28.3)   | 728 (26.7)   |
| <b>ACE or ARB</b>                 | 2,841 (62.9) | 2,844 (62.9) | 2,788 (61.9) | 2,844 (63.2) | 2,481 (61.8) | 2,543 (62.8) | 2,052 (61.2) | 2,093 (62.2) | 1,645 (60.8) | 1,655 (60.8) |
| <b>SGLT2i</b>                     | 110 (2.4)    | 109 (2.4)    | 163 (3.6)    | 160 (3.6)    | 174 (4.3)    | 167 (4.1)    | 161 (4.8)    | 139 (4.1)    | 140 (5.2)    | 138 (5.1)    |
| <b>MRA</b>                        | 581 (12.9)   | 601 (13.3)   | 643 (14.3)   | 650 (14.4)   | 645 (16.1)   | 617 (15.2)   | 542 (16.2)   | 522 (15.5)   | 475 (17.6)   | 446 (16.4)   |
| <b>Loop diuretics</b>             | 73 (1.6)     | 83 (1.8)     | 95 (2.1)     | 129 (2.9)    | 130 (3.2)    | 171 (4.2)    | 140 (4.2)    | 176 (5.2)    | 135 (5.0)    | 159 (5.8)    |
| Baseline<br>eGFR ≥60<br>(N=9,038) | Baseline     |              | 6 months     |              | 12 months    |              | 18 months    |              | 24 months    |              |
|                                   | CTD          | HCTZ         | CTD          | HCTZ         | CTD          | HCTZ         | CTD          | HCTZ         | CTD          | HCTZ         |
|                                   | (n=1,598)    | (n=1,629)    | (n=1,591)    | (n=1,620)    | (N=1,412)    | (n=1,405)    | (n=1,146)    | (n=1,160)    | (n=888)      | (n=885)      |
| <b>ACE</b>                        | 662 (41.4)   | 675 (41.4)   | 648 (40.7)   | 648 (40.0)   | 577 (40.9)   | 554 (39.4)   | 452 (39.4)   | 447 (38.5)   | 346 (39.0)   | 331 (37.4)   |
| <b>ARB</b>                        | 472 (29.5)   | 525 (26.8)   | 473 (29.7)   | 528 (27.4)   | 414 (29.3)   | 449 (27.3)   | 346 (30.2)   | 377 (26.9)   | 273 (30.7)   | 280 (26.7)   |
| <b>ACE or ARB</b>                 | 1,133 (70.9) | 1,191 (73.1) | 1,115 (70.1) | 1,172 (72.3) | 985 (69.8)   | 1,001 (71.2) | 791 (69.0)   | 822 (70.9)   | 617 (69.5)   | 63 (7.1)     |
| <b>SGLT2i</b>                     | 51 (3.2)     | 61 (3.7)     | 79 (5.0)     | 97 (6.0)     | 79 (5.6)     | 91 (6.5)     | 66 (5.8)     | 84 (7.2)     | 61 (6.9)     | 107 (12.1)   |
| <b>MRA</b>                        | 188 (11.8)   | 183 (11.2)   | 218 (13.7)   | 192 (11.9)   | 201 (14.2)   | 173 (12.3)   | 156 (13.6)   | 163 (14.1)   | 126 (14.2)   | 126 (14.2)   |
| <b>Loop diuretics</b>             | 58 (3.6)     | 74 (4.5)     | 88 (5.5)     | 110 (6.8)    | 105 (7.4)    | 109 (7.8)    | 90 (7.9)     | 116 (10.0)   | 90 (10.1)    | 606 (68.5)   |



**eFigure 4.** Adjusted Subgroup Analysis: Time to Doubling of Serum Creatinine, Terminal eGFR <15 mL/min/1.73m<sup>2</sup>, or Dialysis Initiation

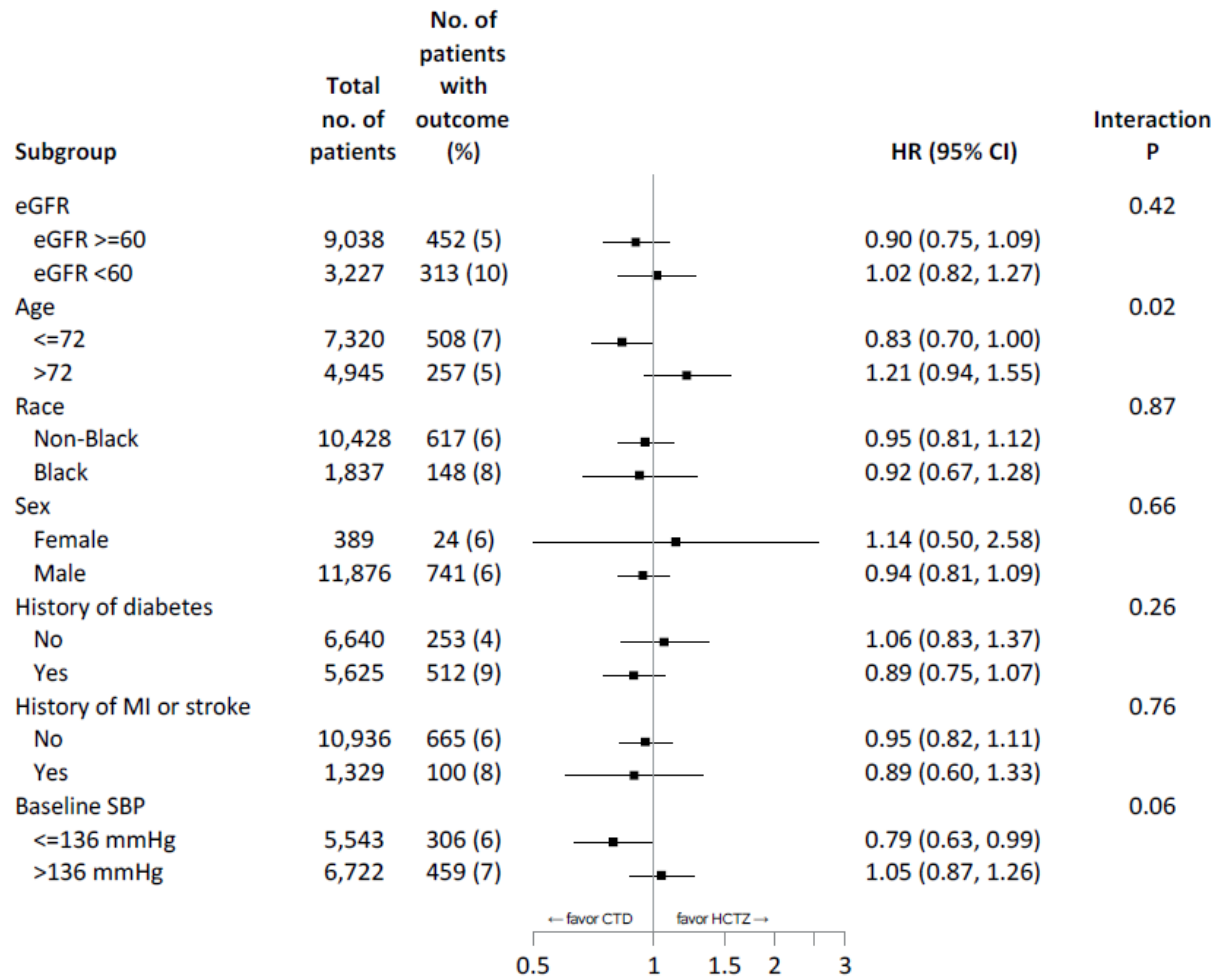

**eFigure 5.** Unadjusted Subgroup Analysis: Time to > 40% Reduction in eGFR, Terminal eGFR < 15 mL/min/1.73m<sup>2</sup>, or Dialysis Initiation

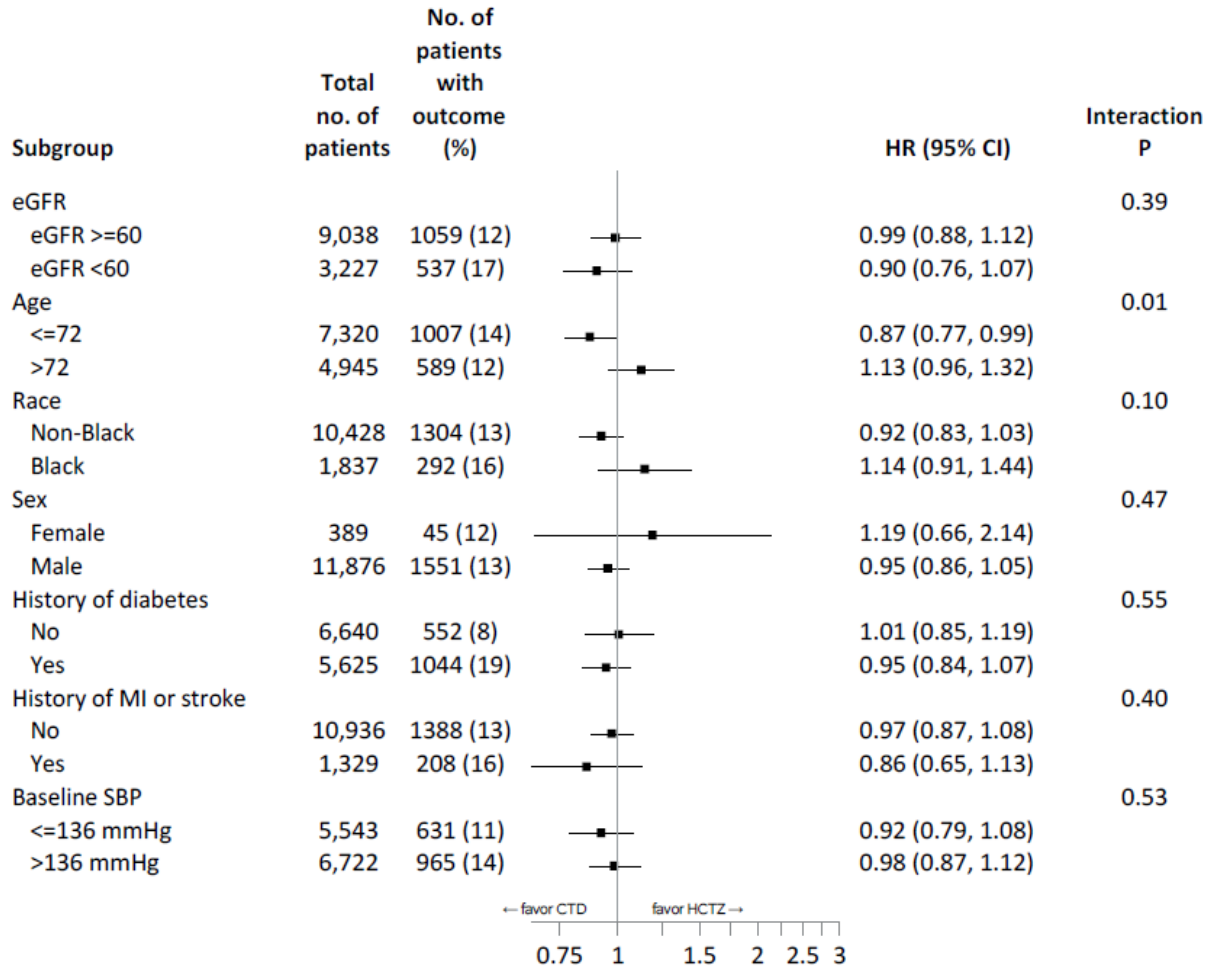

**eTable 4.** Safety Outcomes by Treatment and eGFR Level

|                                         | Baseline eGFR $\geq$ 60<br>(N=9,038) |                     |                      | Baseline eGFR <60<br>(N=3,227) |                     |                      |
|-----------------------------------------|--------------------------------------|---------------------|----------------------|--------------------------------|---------------------|----------------------|
|                                         | CTD<br>(n = 4,520)                   | HCTZ<br>(n = 4,518) | p-value <sup>a</sup> | CTD<br>(n = 1,598)             | HCTZ<br>(n = 1,629) | p-value <sup>a</sup> |
| <b>Safety outcomes</b>                  |                                      |                     |                      |                                |                     |                      |
| Hospitalization for acute kidney injury | 229 (5.1)                            | 205 (4.5)           | 0.26                 | 162 (10.1)                     | 174 (10.7)          | 0.64                 |
| Hypokalemia                             | 416 (9.2)                            | 315 (7.0)           | <0.001               | 129 (8.1)                      | 111 (6.8)           | 0.18                 |
| Primary cause of hospitalization        | 161 (3.6)                            | 123 (2.7)           | 0.03                 | 52 (3.3)                       | 55 (3.4)            | 0.92                 |
| Potassium lab <3.1 mEq/L                | 305 (6.8)                            | 226 (5.0)           | <0.001               | 95 (5.9)                       | 67 (4.1)            | 0.02                 |

<sup>a</sup> Computed by Fisher exact test.
