# Supplementary material for: Chlorthalidone vs Hydrochlorothiazide and Kidney Outcomes in Patients With Hypertension: A Secondary Analysis of a Randomized Clinical Trial
Source: PubMed Central journal article supplement (PMC11632543; doi:10.1001/jamanetworkopen.2024.49576), 2024-12-10
Supplement: jamanetwopen-e2449576-s003.pdf [file jamanetwopen-e2449576-s003.pdf]

## Data Sharing Statement

Ishani. Chlorthalidone vs Hydrochlorothiazide and Kidney Outcomes in Patients With Hypertension. *JAMA Netw Open*. Published December 10, 2024.

doi:10.1001/jamanetworkopen.2024.49576

### Data

**Additional Information:** ClinicalTrials.gov number, NCT02185417

**Data available:** No

### Additional Information

**Explanation for why data not available:** Outcomes are from clinical datasets which cannot be shared
